# Supplementary material for: Assessing pregnancy and neonatal outcomes in Malawi, South Africa, Uganda, and Zimbabwe: Results from a systematic chart review
Source: PubMed Central journal article supplement (PMC8011748; doi:10.1371/journal.pone.0248423), 2021-03-31
Supplement: pone.0248423.s001.pdf [file pone.0248423.s001.pdf]

**Instructions are in *italics***

**[Notes about skip patterns or question format in brackets]**

**DELIVERY DATA**

1. Study Assigned Maternal Patient ID (PTID) (*assign PTID and record facility-assigned medical record number on link log per site SOPs*): \_\_\_\_\_
2. Number of infants resulting from this delivery:  1  2  3
3. Date of delivery (*only women delivering at the designated facility or admitted to the facility for postpartum care within 7 days of delivery should be included*): \_\_\_\_\_
4. Maternal Age: \_\_\_\_\_ or not documented
5. Gravidity: \_\_\_\_\_ or not documented
6. Parity: \_\_\_\_\_ or not documented
7. Did this patient attend antenatal care? yes no not documented  
7a. If yes, number of ANC visits attended:  
1 2 3 4 or more not documented
8. Maternal HIV status:  
negative positive documented as unknown not documented
9. Was the patient transferred **to this hospital** for delivery from a different facility?  
yes no
10. Was this patient transferred **from this hospital** to a different facility after delivery?  
yes no
11. Was maternal death documented in chart: yes no

## PREGNANCY COMPLICATIONS

### Hypertensive disorders

12. Hypertension: yes no

12a. If yes, specify [[drop down menu](#)] (*Choose one - the most severe diagnosis*):

Chronic, gestational, Pre-eclampsia WITHOUT severe features, Pre-eclampsia WITH severe features, Eclampsia, not specified

12b. [[If Chronic, gestational<sup>i</sup>, Pre-eclampsia WITHOUT severe features<sup>ii</sup>, Pre-eclampsia WITH severe features, Eclampsia are specified, the item below would be required](#)]:

diagnosis term recorded in chart

diagnosis term not recorded in chart but presumed based on chart review (*please specify rationale*): \_\_\_\_\_

### Hemorrhage

13. Post partum hemorrhage: yes no

13a. If yes, specify:

diagnosis term recorded in chart

diagnosis term not recorded in chart but presumed based on chart review (*please specify rationale*) \_\_\_\_\_

### Infection

14. Fever of unclear etiology yes no

14a. If yes, specify:

diagnosis term recorded in chart

diagnosis term not recorded in chart but presumed based on chart review (temp >38.5°C) (*please specify rationale*) \_\_\_\_\_

15. Chorioamnionitis yes no

15a. If yes, specify:

diagnosis term recorded in chart

diagnosis term not recorded in chart but presumed based on chart review (*please specify rationale*)<sup>iii</sup> \_\_\_\_\_

16. Post partum endometritis yes no

16a. If yes, specify:

diagnosis term recorded in chart

diagnosis term not recorded in chart but presumed based on chart review (*please specify rationale*)<sup>iv</sup> \_\_\_\_\_

Items 17-23 will be repeated if there is more than one infant. If completing in paper (backup), please print more Infant forms for additional infants.

INFANT number:  1  2  3

17. Place of infant delivery:

- current health facility
- at a different health facility
- at a home (private residence)
- not documented

18. Pregnancy primary outcome (*check one*):

- full term live birth ( $\geq 37$  weeks)
- premature live birth ( $< 37$  weeks)
- still born/intrauterine fetal demise ( $\geq 20$  weeks)
  - macerated
  - fresh
  - unknown
- not documented

19. Mode of delivery (*check one*):

- vaginal delivery
  - assisted delivery (forceps, vacuum)
  - normal, unassisted delivery
- cesarean delivery
- other (*specify*) \_\_\_\_\_
- not documented

#### INFANT DATA

20. Birthweight recorded:  yes  no

20a. If yes, enter birthweight in grams: \_\_\_\_\_

21. Neonatal death (*infant died AFTER delivery within 7 days of life*):  yes  no

22. Neonatal ICU admission within 7 days of life or transferred to a higher care facility:  yes  no

23. Congenital Malformations identified at delivery:

- none recorded
- yes (*if yes, select as many as appropriate*):
  - Cleft Lip and/or Palate
  - Neural tube defects and/or Hydrocephalus
  - Cardiovascular
  - Polydactyly
  - Musculoskeletal including clubfoot
  - Umbilical Hernia
  - Esophageal, gastrointestinal, or anorectal
  - Genitourinary
  - Trisomies
  - Natal Tooth
  - Other (*describe*): \_\_\_\_\_

**Form Status: complete?**

- Incomplete
- Unverified
- Complete

**[Definitions below will be provided on reference sheet along with other form instructions:]**

---

<sup>i</sup> Pregnancy >20 weeks and NEW diagnosis of hypertension ( $\geq 140$  mmHg systolic and/or  $\geq 90$  mmHg) WITHOUT severe features of pre-eclampsia or proteinuria

<sup>ii</sup> Pregnancy >20 weeks and NEW diagnosis of hypertension ( $\geq 140$  mmHg systolic and/or  $\geq 90$  mmHg) AND proteinuria BUT no severe features which include

- ◦ Severely elevated blood pressures, with systolic blood pressure  $\geq 160$  mmHg and/or diastolic blood pressure  $\geq 110$  mmHg, which is confirmed after only minutes (to facilitate timely antihypertensive treatment)
- ◦ Development of a severe headache (which can be diffuse, frontal, temporal or occipital) that generally does not improve with over the counter pain medications (such as acetaminophen/paracetamol)
- ◦ Development of visual changes (including photopsia, scotomata, cortical blindness)
- ◦ Eclampsia, or new-onset grand mal seizures in a patient with preeclampsia, without other provoking factors (such as evidence of cerebral malaria or preexisting seizure disorder). Seizures are often preceded by headaches, visual changes or altered mental status
- ◦ New onset thrombocytopenia, with platelet count  $< 100,000/\mu\text{L}$
- ◦ New onset of nausea, vomiting, epigastric pain
- ◦ Transaminitis (AST and ALT elevated to twice the upper limit of normal)
- ◦ Liver capsular hemorrhage or liver rupture
- ◦ Worsening renal function, as evidenced by serum creatinine level greater than 1.1 mg/dL or a doubling of the serum creatinine (absent other renal disease)
- ◦ Oliguria (urine output  $< 500$  mL/24 h)
- ◦ Pulmonary edema (confirmed on clinical exam or imaging)

<sup>iii</sup> Mother with temp  $> 38$  degrees Celsius and treated with antibiotics during labor

<sup>iv</sup> Mother with temp  $> 38$  degrees Celsius after delivery and treated with antibiotics
